# Supplementary material for: Non-equilibrium critical dynamics of bursts in θ and δ rhythms as fundamental characteristic of sleep and wake micro-architecture
Source: PLoS Comput Biol. 2019 Nov 14;15(11):e1007268. doi: 10.1371/journal.pcbi.1007268 (PMC6855414; doi:10.1371/journal.pcbi.1007268)
Supplement: S1 File — Supporting information presenting tests to validate reported empirical results for recordings during 12-hour light and 12-hour dark periods and for different parameter values: (i) surrogate test to confirm physiological origin of the power-law distribution for θ-burst and Weibull distribution for δ-burst durations (Fig. A); (ii) range of threshold values Th for the ratio Rθδ(t) between δ and θ spectral power (Fig. B and Fig. C); (iii) different window sizes w for the EEG spectral power analysis (Fig. D and Fig. E); (iv) different threshold values D0 defining quite times between consecutive θ-bursts to test for scale-invariant organization in quiet times (Fig. F); and (v) conditional probabilities P(dδi | dθi−1) of δ-burst durations dδi for different values of the preceding θ-burst duration dθi−1 to confirm robustness of anti-correlated coupling between consecutive δ- and θ-bursts (Fig. G). (PDF) [file pcbi.1007268.s001.pdf]

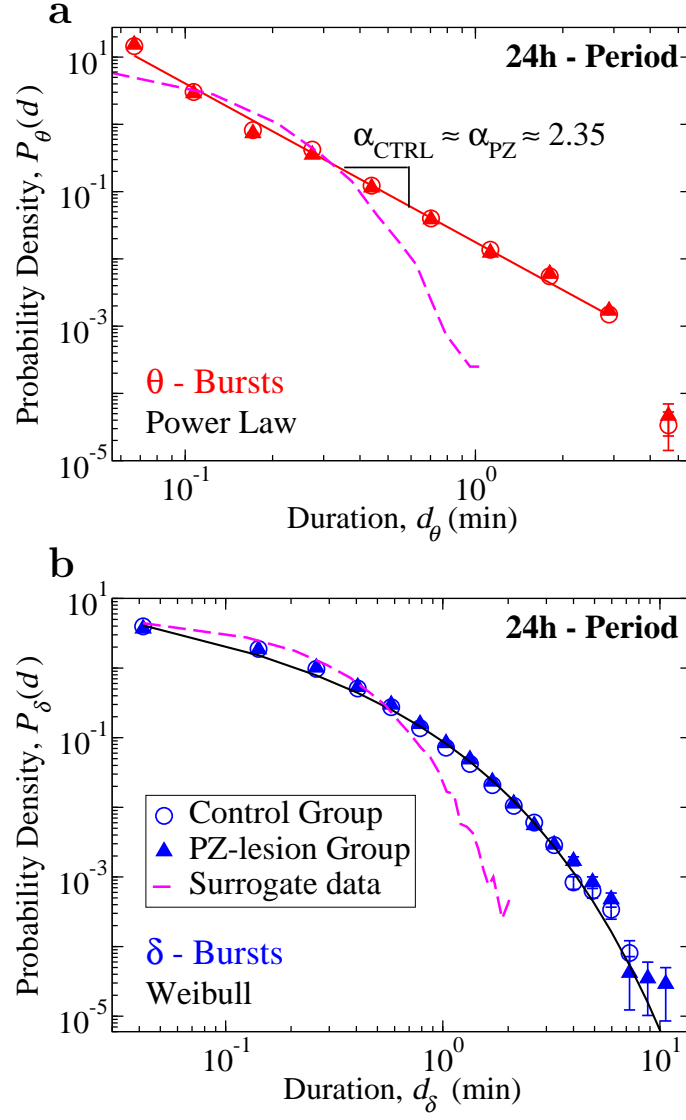

*Fig. A* **Distributions of surrogate  $\theta$ - and  $\delta$ -burst durations markedly deviates from the original distributions discussed in the main text (Fig. 2).** Procedure for generating surrogate  $\theta$ - and  $\delta$ -burst durations is explained in the Materials and methods, Data analysis. (a) Probability density of original  $\theta$ -burst durations for control (open circles) and PZ-lesioned rats (full triangles) over the 24h period (pooled data) are compared with the probability density of surrogate  $\theta$ -burst durations (magenta dashed line). In contrast to the original  $\theta$ -burst durations, the probability density of surrogates does not follow a power-law behavior, and is close to an exponential distribution. (b) Probability density of original  $\delta$ -burst durations for control (open circles) and PZ-lesioned rats (full triangles) over 24 h period (pooled data) are compared with the probability density of surrogate  $\delta$ -burst durations (magenta dashed line). The probability density of surrogate  $\delta$ -burst durations departs from the original Weibull and follows an exponential behavior.

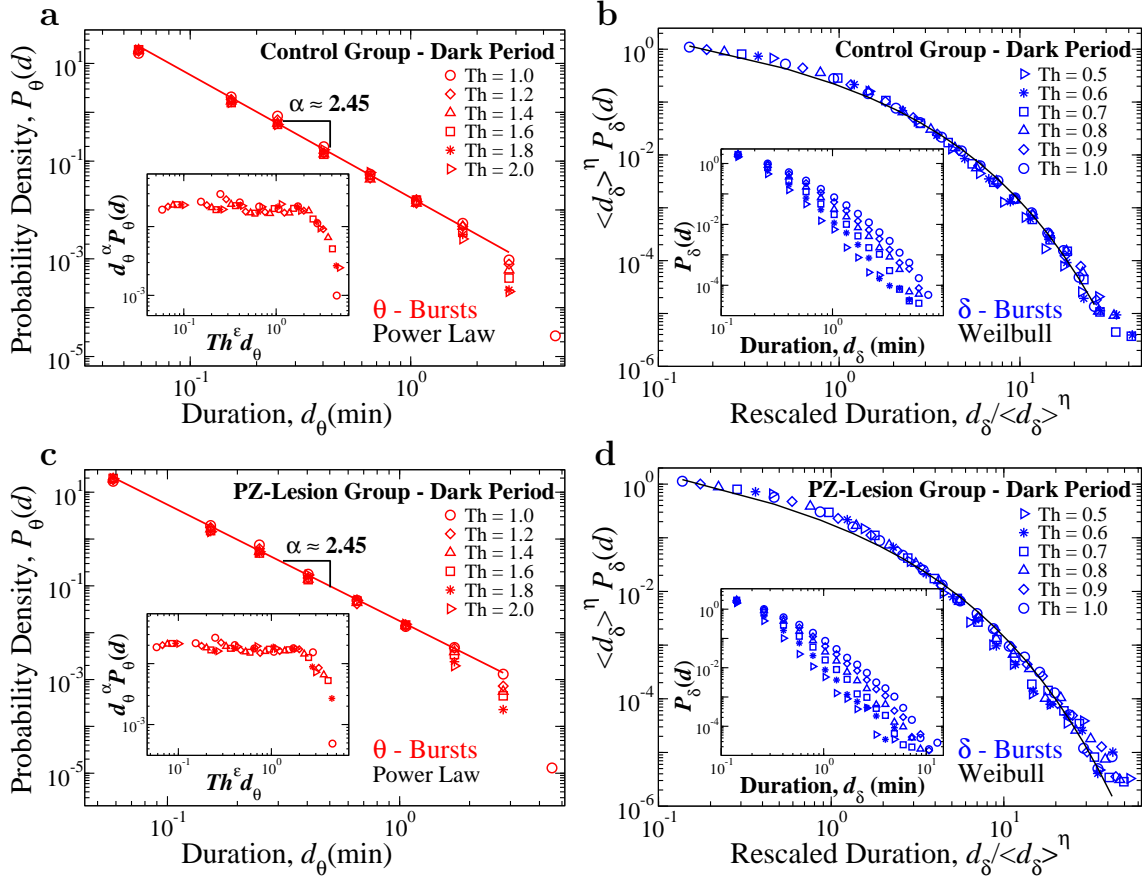

*Fig. B* Distribution of  $\theta$ - and  $\delta$ -burst durations in the dark period are independent of the specific threshold  $Th$  used to identify bursts and can be described by unique scaling functions. Distribution of  $\theta$ - and  $\delta$ -burst durations in the dark period for different threshold values  $Th$  on the ratio  $R_{\theta\delta}$  and window size  $w = 5$  s. (a) Distribution of  $\theta$ -burst durations for control rats over a 12 h dark period (pooled data). Distributions evaluated using different  $Th$  values consistently follow the same power-law behaviour (red tick line), with an exponential cutoff that is controlled by  $Th$ . Inset: the data collapse onto a universal function  $f_\theta$  when we plot  $P(d)d^\alpha$  versus  $Th^\epsilon d$ , with  $\alpha = 2.45$  and  $\epsilon = 0.8$ . (b) Rescaled distribution of  $\delta$ -burst durations for control rats over a 12 h dark period (pooled data). Distributions are rescaled by  $\langle d_\delta \rangle^\eta$ , with  $\langle d_\delta \rangle$  mean  $\delta$ -burst duration and  $\eta = 1.2$ . After rescaling, distributions collapse onto a single function that is well fitted by a Weibull distribution  $f(d; \lambda, \beta)$  (black thick line), with  $\lambda = 0.60$  and  $\beta = 0.54$ . Inset: distributions  $P_\delta$  for different thresholds  $Th$  (not rescaled). (c) Distribution of  $\theta$ -burst durations for PZ-lesioned rats over a 12h period (pooled data). Distributions evaluated using different  $Th$  values consistently follow the same power-law behavior (red tick line), with a cutoff that is controlled by  $Th$ . Inset: Data collapse onto a single function by plotting  $P(d)d^\alpha$  versus  $Th^\epsilon d$  with  $\alpha = 2.45$  and  $\epsilon = 0.8$ . (d) Rescaled distribution of  $\delta$ -burst durations for PZ-lesioned rats over a 12h dark period (pooled data). Distributions are rescaled by  $\langle d_\delta \rangle^\eta$ , with  $\langle d_\delta \rangle$  mean  $\delta$ -burst

duration and  $\eta = 1.2$ . After rescaling, the distributions collapse onto a single function that is well fitted by a Weibull distribution  $f(d; \lambda, \beta)$  (black thick line), with  $\beta = 0.50$  and  $\lambda = 0.37$ . Inset: Distributions  $P_\delta$  for different thresholds (not rescaled).

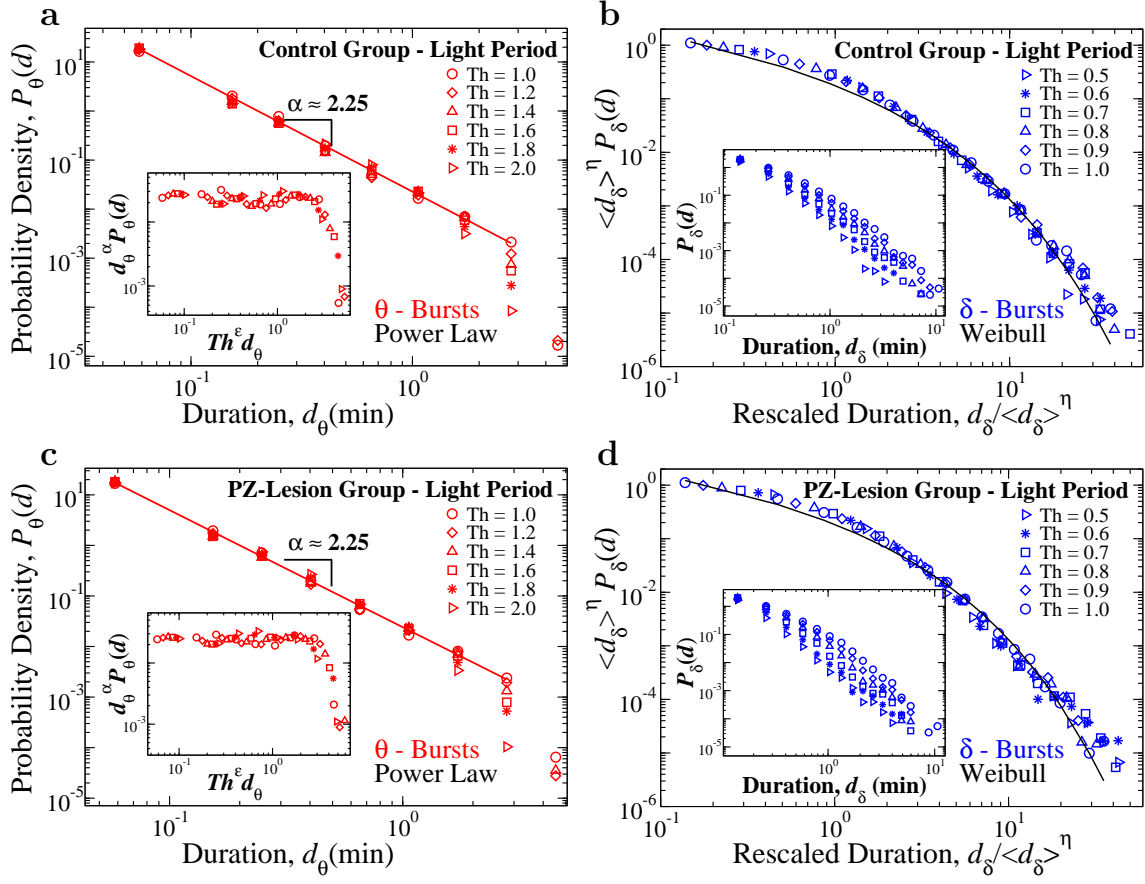

*Fig. C* Distribution of  $\theta$ - and  $\delta$ -burst durations in the light period are independent of the specific threshold  $Th$  used to identify bursts and can be described by scaling functions. Distribution of  $\theta$ - and  $\delta$ -burst durations in the light period for different threshold values  $Th$  on the ratio  $R_{\theta\delta}$  and window size  $w = 5$  s. (a) Distribution of  $\theta$ -burst durations for control rats over a 12 h light period (pooled data). Distributions evaluated using different  $Th$  values consistently follow the same power-law behaviour (red tick line), with a cutoff that is controlled by  $Th$ . Inset: the data collapse onto a single function when we plot  $P(d)d^\alpha$  versus  $Th^\epsilon d$ , with  $\alpha = 2.25$  and  $\epsilon = 0.8$ . (b) Rescaled distribution of  $\delta$ -burst durations for control rats over a 12 h light period (pooled data). Distributions are rescaled by  $\langle d_\delta \rangle^\eta$ , with  $\langle d_\delta \rangle$  mean  $\delta$ -burst duration and  $\eta = 1.2$ . After rescaling, distributions collapse onto a single function, a Weibull distribution  $f(d; \lambda, \beta)$  (black thick line), with  $\beta = 0.55$  and  $\lambda = 0.46$ . Inset: Distributions  $P_\delta$  for different thresholds (not rescaled). (c) Distribution of  $\theta$ -burst durations for PZ-lesioned rats over a 12 h period (pooled data). Distributions evaluated using different  $Th$  values consistently follow the same power-law behaviour (red tick line), with a cutoff that is controlled by  $Th$ . Inset: data collapse onto a universal function  $f_\theta$  by plotting  $P(d)d^\alpha$  versus  $Th^\epsilon d$  with  $\alpha = 2.25$  and  $\epsilon = 0.8$ . (d) Rescaled distribution of  $\delta$ -burst durations for PZ-lesioned rats over a 12 h light period (pooled data). Distributions are rescaled by  $\langle d_\delta \rangle^\eta$ , with  $\langle d_\delta \rangle$  mean  $\delta$ -burst duration and  $\eta = 1.2$ . After rescaling, the distributions

collapse onto a single function, a Weibull distribution  $f(d; \lambda, \beta)$  (black thick line), with  $\beta = 0.56$  and  $\lambda = 0.47$ . Inset: Distributions  $P_\delta$  for different thresholds (not rescaled).

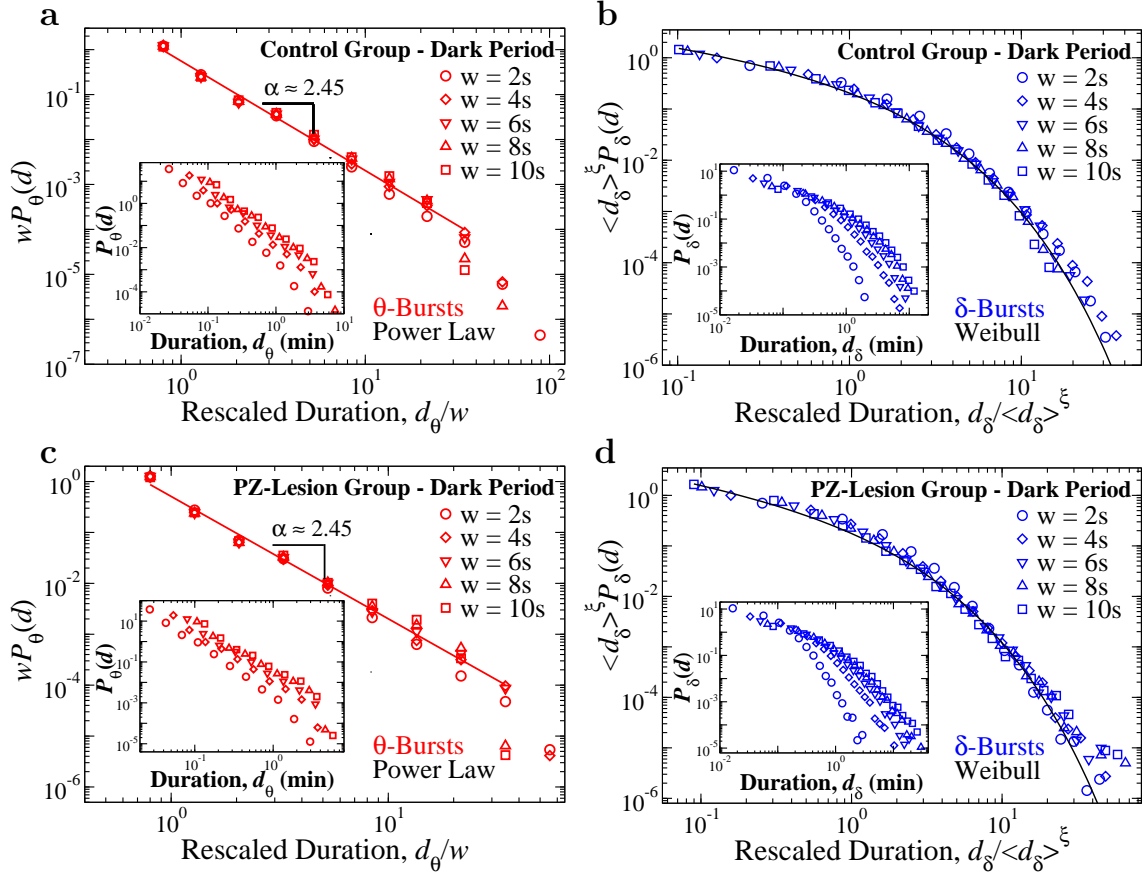

**Fig. D** Distribution of  $\theta$ - and  $\delta$ -burst durations in the dark period are independent of the specific window size  $w$  used to identify bursts and can be described by unique scaling functions. Distribution of  $\theta$ - and  $\delta$ -burst durations in dark period for different window sizes  $w$  and  $Th = 1$  on the ratio  $R_{\theta\delta}$ . (a) Rescaled distribution of  $\theta$ -burst durations for control rats over a 12h dark period (pooled data). Distributions are rescaled by the window size  $w$  and consistently show the same power-law behavior with  $\alpha = 2.45$  (red tick line), as proven by the data collapse. Inset: Distributions  $P_\theta$  for different window sizes (not rescaled). (b) Rescaled distribution of  $\delta$ -burst durations for control rats over a 12 h dark period (pooled data). Distributions are rescaled by  $\langle d_\delta \rangle^\xi$ , with  $\langle d_\delta \rangle$  mean  $\delta$ -burst duration and  $\xi = 1.2$ , and collapse onto a single function that is well described by a Weibull distribution  $f(d; \lambda, \beta)$  (black thick line), with  $\beta = 0.59$  and  $\lambda = 0.57$ . Inset: Distributions  $P_\delta$  for different window sizes (not rescaled). (c) Rescaled distribution of  $\theta$ -burst durations for PZ-lesioned rats over a 12 h dark period (pooled data). Distributions are rescaled by the window size  $w$  and consistently show the same power-law behavior with  $\alpha = 2.45$  (red tick line), as proven by the data collapse. Inset: Distributions  $P_\theta$  for different window sizes (not rescaled). (d) Rescaled distribution of  $\delta$ -burst durations for PZ-lesioned rats over a 12h dark period (pooled data). Distributions are rescaled by  $\langle d_\delta \rangle^\xi$ , with  $\langle d_\delta \rangle$  mean  $\delta$ -burst duration and  $\xi = 1.2$ , and collapse onto a single function that is well fitted by a Weibull distribution

$f(d; \lambda, \beta)$  (black thick line), with  $\beta = 0.54$  and  $\lambda = 0.45$ . Inset: Distributions  $P_\delta$  for different window sizes (not rescaled).

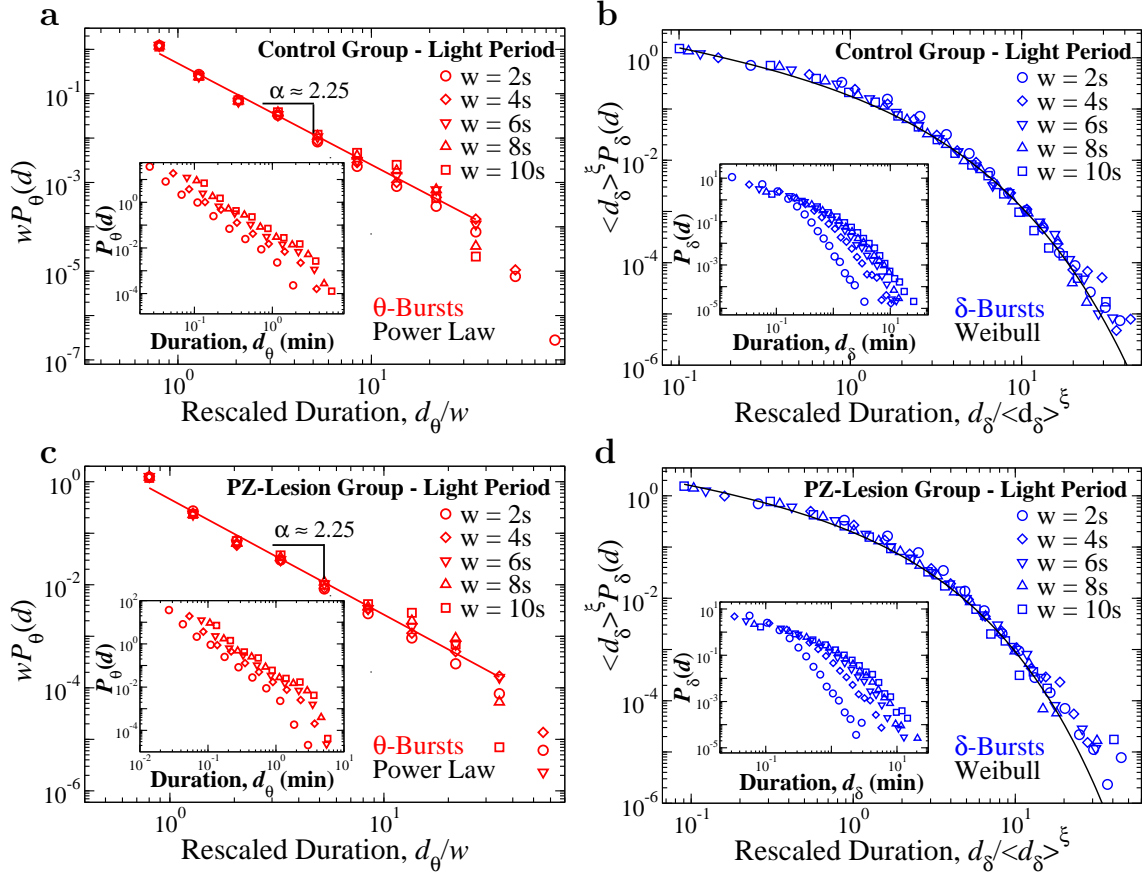

*Fig. E* Distribution of  $\theta$ - and  $\delta$ -burst durations in the light period are independent of the specific window size  $w$  used to identify bursts and can be described by unique scaling functions. Distribution of  $\theta$ - and  $\delta$ -burst durations in light period for different window sizes  $w$  and  $Th = 1$  on the ratio  $R_{\theta\delta}$ . (a) Rescaled distribution of  $\theta$ -burst durations for control rats over a 12h light period (pooled data). Distributions are rescaled by the window size  $w$  and consistently show the same power-law behavior with  $\alpha = 2.25$  (red tick line), as proven by the data collapse. Inset: Distributions  $P_\theta$  for different window sizes (not rescaled). (b) Rescaled distribution of  $\delta$ -burst durations for control rats over a 12h light period (pooled data). Distributions are rescaled by  $\langle d_\delta \rangle^\xi$ , with  $\langle d_\delta \rangle$  mean  $\delta$ -burst duration and  $\xi = 1.2$ , and collapse onto a single function that is well described by a Weibull distribution  $f(d; \lambda, \beta)$  (black thick line), with  $\beta = 0.54$  and  $\lambda = 0.44$ . Inset: Distributions  $P_\delta$  for different window sizes (not rescaled). (c) Rescaled distribution of  $\theta$ -burst durations for PZ-lesioned rats over a 12h light period (pooled data). Distributions are rescaled by the window size  $w$  and consistently show the same power-law behavior with  $\alpha = 2.25$  (red tick line), as proven by the data collapse. Inset: Distributions  $P_\theta$  for different window sizes (not rescaled). (d) Rescaled distribution of  $\delta$ -burst durations for PZ-lesioned rats over a 12 h light period (pooled data). Distributions are rescaled by  $\langle d_\delta \rangle^\xi$ , with  $\langle d_\delta \rangle$  mean  $\delta$ -burst duration and  $\xi = 1.2$ , and collapse onto a single function that is well described by a

Weibull distribution  $f(d; \lambda, \beta)$  (black thick line), with  $\beta = 0.56$  and  $\lambda = 0.48$ . Inset: Distributions  $P_\delta$  for different window sizes (not rescaled).

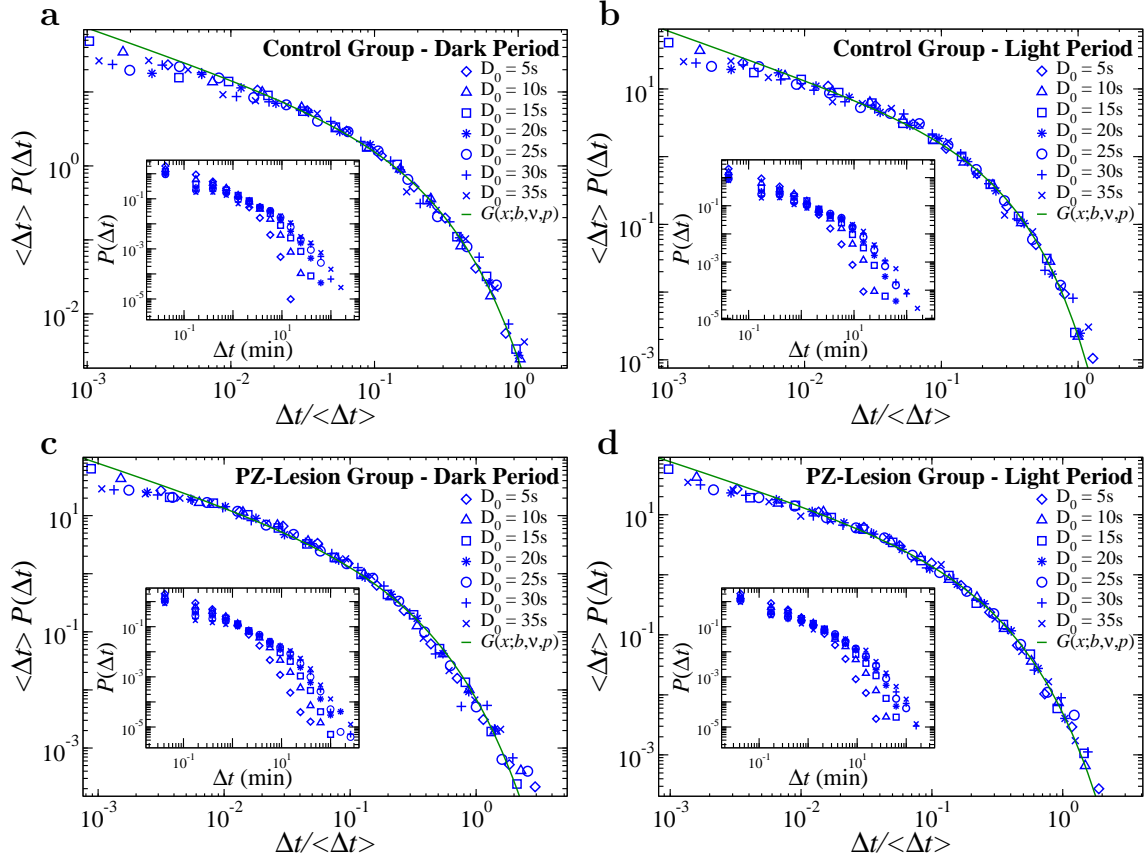

*Fig. F* Distribution of quiet times between consecutive  $\theta$ -bursts for different thresholds  $D_0$  on  $\theta$ -burst durations in dark and light periods. When rescaled by  $\langle \Delta t \rangle$  (main panels), distributions collapse onto a unique function that is well fitted by a generalized Gamma function  $G(x; b, \nu, p)$  (green tick lines). (a) Distributions of quiet times for different thresholds  $D_0$  on  $\theta$ -burst durations in 12h dark period for control rats. Generalized gamma fit (green tick line):  $b = 1, \nu = 0.58$ , and  $p = 0.8$ . (b) Distributions of quiet times for different thresholds  $D_0$  on  $\theta$ -burst durations in 12 h light period for control rats. Generalized gamma fit (green tick line):  $b = 1, \nu = 0.47$ , and  $p = 0.77$ . (c) Distributions of quiet times for different thresholds  $D_0$  on  $\theta$ -burst durations in 12 h dark period for PZ-lesioned rats. Generalized gamma (green tick line):  $b = 0.95, \nu = 0.47$ , and  $p = 0.72$ . (d) Distributions of quiet times for different thresholds  $D_0$  on  $\theta$ -burst durations in 12 h light period for PZ-lesioned rats. Generalized gamma fit (green tick line):  $b = 1.89, \nu = 0.35$ , and  $p = 0.93$ .

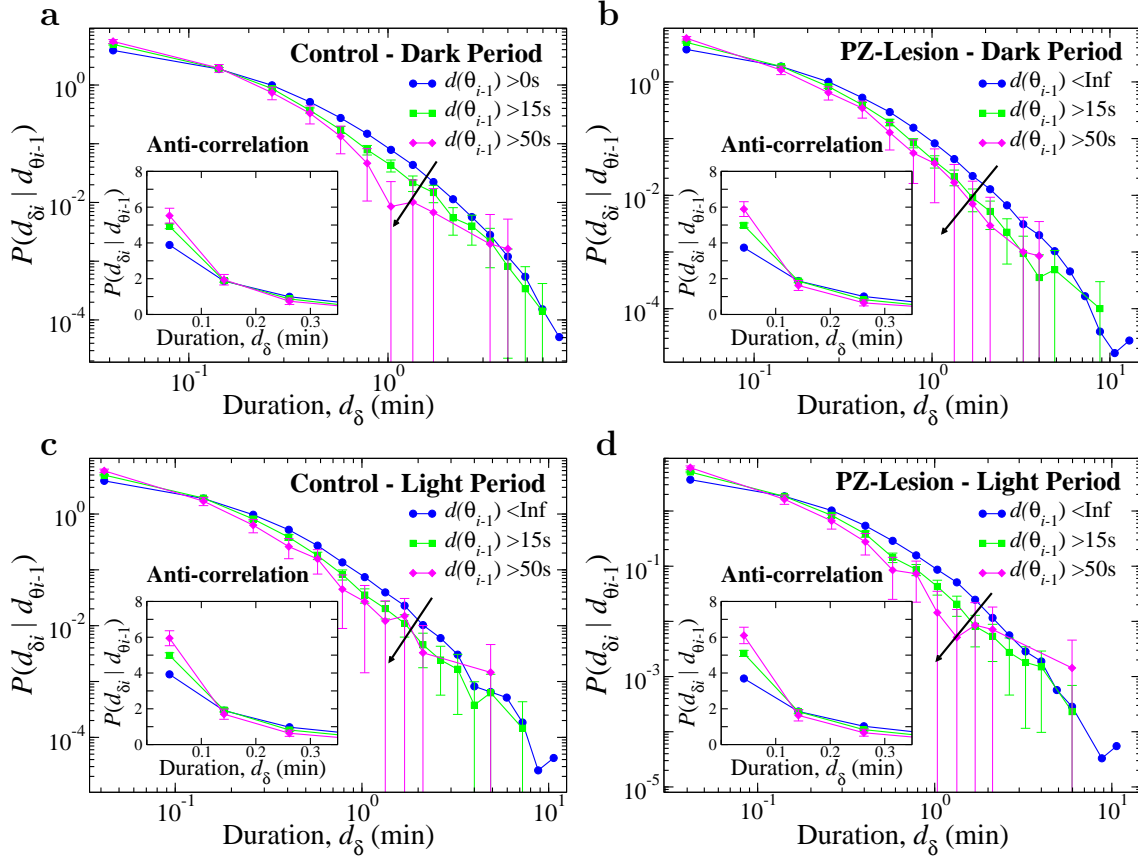

*Fig. G* **Distributions of conditional probabilities for  $\delta$ -burst durations.** (a) Distribution of durations  $d_{\delta_i}$  given that the duration of the preceding  $\theta$ -burst is larger than a given threshold  $d^*$  ( $d^* = 15\text{s}$  and  $d^* = 50\text{s}$ ) for control rats in dark periods. (b) Distribution of durations  $d_{\delta_i}$  given that the duration of the preceding  $\theta$ -burst is larger than a given threshold,  $d^* = 15\text{s}$  and  $d^* = 50\text{s}$ , for PZ-lesioned rats in dark periods. Durations are calculated using a window  $w = 5\text{ s}$  and a threshold  $Th = 1$  on the ratio  $R_{\theta/\delta}$ . (c) Distribution of durations  $d_{\delta_i}$  given that the duration of the preceding  $\theta$ -burst is larger than a given threshold  $d^*$  ( $d^* = 15\text{s}$  and  $d^* = 50\text{s}$ ) for control rats in light periods. (d) Distribution of durations  $d_{\delta_i}$  given that the duration of the preceding  $\theta$ -burst is larger than a given threshold,  $d^* = 15\text{s}$  and  $d^* = 50\text{s}$ , for PZ-lesioned rats in light periods. Durations are calculated using a window  $w = 5\text{ s}$  and a threshold  $Th = 1$  on the ratio  $R_{\theta/\delta}$ . Inset in each panel shows details of conditional probability distribution for short  $d_{\delta_i} < 0.4\text{ min}$ .
